# Supplementary material for: Matched comparison between external aortic root support and valve-sparing root replacement
Source: PubMed Central journal article supplement (PMC10313978; doi:10.1136/heartjnl-2022-321840), 2023-01-17
Supplement: heartjnl-2022-321840supp001.pdf [file heartjnl-2022-321840supp001.pdf]

## Supplementary data

**Table S1. Detailed perioperative and postoperative outcomes.** Symbols <sup>1</sup> and <sup>2</sup> refer to the same 2 patients. \*: underwent reintervention on both aortic valve and the aorta. °: this patient first underwent a reoperation on the aortic valve, and later on the mitral valve. Continuous variables compared using Student's t-test, categorical variables compared using Chi square, Fisher's exact test or Log Rank test as appropriate. Ao Asc=ascending aorta, AS=aortic stenosis, AR=aortic regurgitation, FET=frozen elephant trunk, MVP=mitral valve plasty, RCA=right coronary artery, TEVAR=thoracic endovascular aneurysm repair, TRR=total root replacement.

| IN-HOSPITAL OUTCOMES                          | PEARS (n=159)                                                                                                                                                                                                    | VSRR (n=142)                                                                                                                                                                                                                                                      | P-value |
|-----------------------------------------------|------------------------------------------------------------------------------------------------------------------------------------------------------------------------------------------------------------------|-------------------------------------------------------------------------------------------------------------------------------------------------------------------------------------------------------------------------------------------------------------------|---------|
| <b>Intraoperative conversion</b>              | 2 (1.2%)<br>1 VSRR - very thin aorta<br>1 Florida sleeve - haematoma on RCA                                                                                                                                      | 0 (0%)                                                                                                                                                                                                                                                            | 1.00    |
| <b>Reoperation for bleeding</b>               | 0 (0%)                                                                                                                                                                                                           | 10 (7%)                                                                                                                                                                                                                                                           | <0.001  |
| <b>Coronary revascularization</b>             | 7 (4.4%)<br>3 CABG after RCA injury<br>1 mesh reopened urgently for RV stunning <sup>1</sup><br>1 CABG, ECMO after coronary injury <sup>2</sup><br>1 CABG due to VFib<br>1 CABG for LV failure after PEARS + MVP | 1 (0.7%)<br>1 stent to right coronary artery                                                                                                                                                                                                                      | 0.07    |
| <b>Myocardial infarction</b>                  | 3 (1.9%)                                                                                                                                                                                                         | 0 (0%)                                                                                                                                                                                                                                                            | 0.25    |
| <b>Stroke</b>                                 | 1 (0.6%)                                                                                                                                                                                                         | 2 (1.4%)                                                                                                                                                                                                                                                          | 0.60    |
| <b>Perioperative dissection</b>               | 1 (0.6%)                                                                                                                                                                                                         | 1 (0.7%)                                                                                                                                                                                                                                                          | 1.00    |
| <b>Perioperative death</b>                    | 1 (0.6%) <sup>2</sup>                                                                                                                                                                                            | 0 (0%)                                                                                                                                                                                                                                                            | 1.00    |
| <b>AR grade postop</b>                        |                                                                                                                                                                                                                  |                                                                                                                                                                                                                                                                   | <0.001  |
| 0/4                                           | 144 (92.3%)                                                                                                                                                                                                      | 100 (72.5%)                                                                                                                                                                                                                                                       |         |
| 1/4                                           | 12 (7.7%)                                                                                                                                                                                                        | 34 (24.6%)                                                                                                                                                                                                                                                        |         |
| 2/4                                           | 0 (0%)                                                                                                                                                                                                           | 4 (2.9%)                                                                                                                                                                                                                                                          |         |
| <b>Length of stay (d)</b>                     | 6 (5 - 7)                                                                                                                                                                                                        | 7 (6 - 10)                                                                                                                                                                                                                                                        | <0.001  |
| POSTOPERATIVE OUTCOMES                        | PEARS (n=159)                                                                                                                                                                                                    | VSRR (n=142)                                                                                                                                                                                                                                                      | P-value |
| <b>Cardiac / aortic reintervention</b>        | 3 (1.9%)                                                                                                                                                                                                         | 11 (7.7%)                                                                                                                                                                                                                                                         | 0.17    |
| <b>Aortic valve reintervention</b>            | 1 (0.6%)<br>1 TRR because mesh was reopened urgently (6y) <sup>1</sup>                                                                                                                                           | 7 (4.9%)<br>1 endocarditis (1m)<br>4 due to AR (1, °2, 4 and *16y)<br>1 due to mixed AS/AR (8y)<br>1 TRR and Ao Asc replacement (14y) *                                                                                                                           | 0.12    |
| <b>Cardiac / Ao Asc / Arch reintervention</b> | 3 (1.9%)<br>1 redo-PEARS for faulty use - incomplete coverage (3y)<br>1 TRR because mesh was reopened urgently (6y) <sup>1</sup><br>1 redo-PEARS for bulge around RCA (9y)                                       | 7 (4.9%)<br>1 for mitral valve endocarditis (4m)<br>1 for mitral para-prosthetic leak (3y) °<br>2 Ao Asc & Arch replacement + FET (4 and 5y)<br>1 debranching + TEVAR (6y)<br>1 TRR and Ao Asc replacement (14y) *<br>1 TRR + Ao Asc + Arch + debranching (16y) * | 0.71    |
| <b>Type A dissection</b>                      | 0 (0%)                                                                                                                                                                                                           | 0 (0%)                                                                                                                                                                                                                                                            | -       |
| <b>Type B dissection</b>                      | 1 (0.6%)                                                                                                                                                                                                         | 5 (3.5%)                                                                                                                                                                                                                                                          | 0.26    |
| <b>Death</b>                                  | 2 (1.2%)<br>1 unknown (1y)<br>1 arrhythmia (4y)                                                                                                                                                                  | 4 (2.8%)<br>2 non cardiac (2m and 18y)<br>1 unknown (13y)<br>1 post-aortic reintervention (5y)                                                                                                                                                                    | 0.96    |
| <b>AR grade at last follow-up</b>             |                                                                                                                                                                                                                  |                                                                                                                                                                                                                                                                   | <0.001  |
| 0/4                                           | 129 (89.6%)                                                                                                                                                                                                      | 64 (49.6%)                                                                                                                                                                                                                                                        |         |
| 1/4                                           | 14 (9.7%)                                                                                                                                                                                                        | 51 (39.5%)                                                                                                                                                                                                                                                        |         |
| 2/4                                           | 1 (0.7%)                                                                                                                                                                                                         | 4 (3.1%)                                                                                                                                                                                                                                                          |         |
| 3 and 4/4                                     |                                                                                                                                                                                                                  | 10 (7.8%)                                                                                                                                                                                                                                                         |         |
