# Supplementary material for: Matched comparison between external aortic root support and valve-sparing root replacement
Source: PubMed Central journal article supplement (PMC10313978; doi:10.1136/heartjnl-2022-321840), 2023-01-17

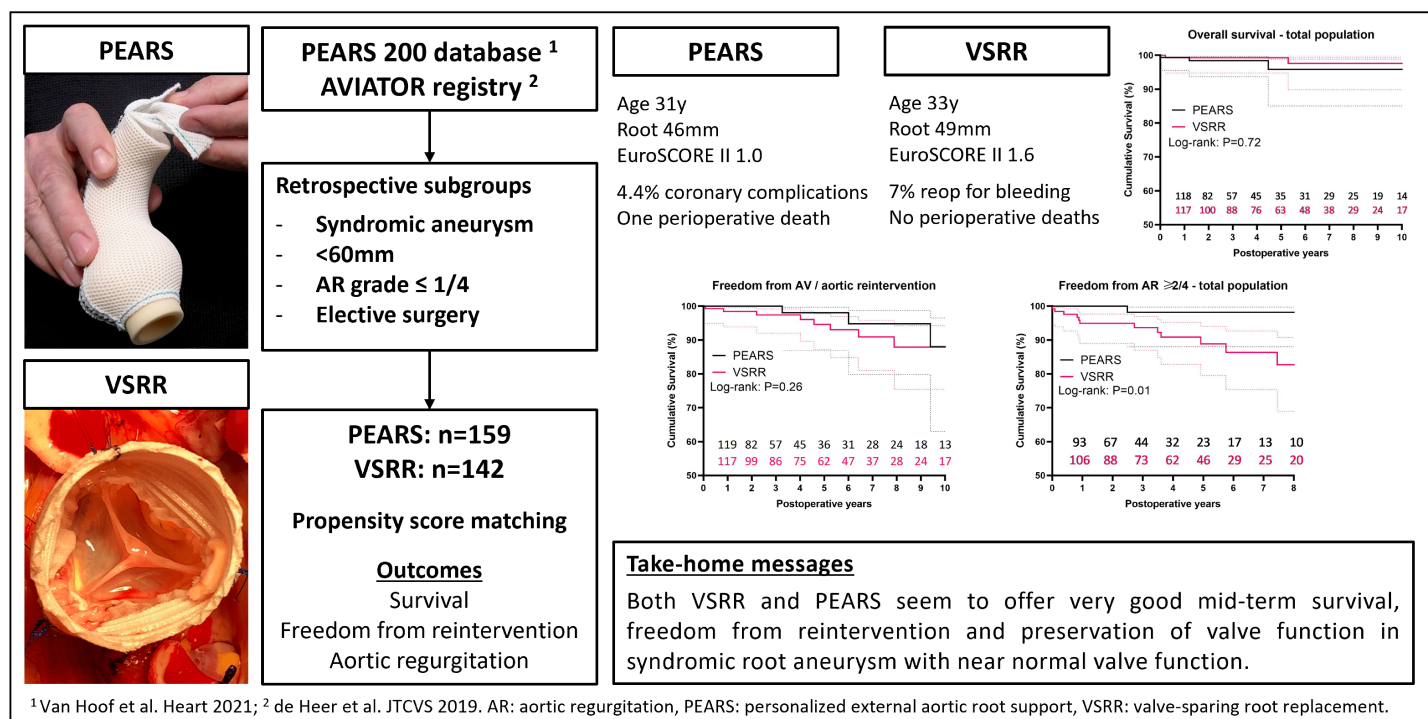

Supplement: heartjnl-2022-321840supp002.pdf [file heartjnl-2022-321840supp002.pdf]
